# Supplementary material for: Comparative Chloroplast Genomes of Nicotiana Species (Solanaceae): Insights Into the Genetic Variation, Phylogenetic Relationship, and Polyploid Speciation
Source: Front Plant Sci. 2022 Jul 4;13:899252. doi: 10.3389/fpls.2022.899252 (PMC9295722; doi:10.3389/fpls.2022.899252)
Supplement: Supplementary file 1 [file Table_1.XLSX]

## Sheet: Table S1
Table S1 The number of RNA editing sites in different genes of Nicotiana chloroplast genomes.
Spacies	atpA	atpF	ndhA	ndhB	ndhD	ndhF	petB	psbE	psbL	rpl20	rpoA	rpoB	rpoC1	rpoC2	rps14	rps2	Total
N. tabacum cv. K326	1	1	2	9	6	1	1	1	1	1	1	4	1	2	2	1	35
N. tabacum cv. Basma Xanthi	1	1	2	9	6	1	1	1	1	1	1	4	1	2	2	1	35
N. rosulata subsp. rosulata	1	1	2	9	7	1	1	1	1	1	1	4	1	2	2	1	36
N. paniculata	1	1	2	9	7	1	1	1	1	1	1	4	1	2	2	1	36
N. cavicola	1	1	3	9	7	1	1	1	1	1	1	4	1	2	2	1	37
N. nesophila	1	1	2	9	7	1	1	1	1	1	1	4	1	2	2	1	36
N. occidentalis subsp. occidentalis	1	1	2	9	7	1	1	1	1	1	1	4	1	2	2	1	36
N. rustica	1	1	2	9	7	1	1	1	1	1	1	4	1	2	2	1	36
N. nudicaulis	1	1	2	9	7	1	1	1	1	1	1	4	1	2	2	1	36
N. tomentosiformis	1	1	3	9	7	1	1	1	1	1	1	4	1	2	2	1	37
N. obtusifolia	1	1	2	9	7	1	1	1	1	1	1	4	1	2	2	1	36
N. attenuata	1	1	2	9	7	2	1	1	1	1	1	4	1	2	2	1	37
N. otophora	1	1	3	9	7	0	1	1	1	1	1	4	2	3	2	1	38
N. simulans	1	1	2	9	7	1	1	1	1	1	1	4	1	2	2	1	36
N. repanda	1	1	2	9	7	1	1	1	1	1	1	4	1	2	2	1	36
N. benthamiana	1	1	2	9	7	1	1	1	1	1	1	4	1	2	2	1	36
N. knightiana	1	1	2	9	7	1	1	1	1	1	1	4	1	2	2	1	36
N. stocktonii	1	1	2	9	7	1	1	1	1	1	1	4	1	2	2	1	36
N. sylvestris	1	1	2	9	6	1	1	1	1	1	1	4	1	2	2	1	35
N. heterantha	1	1	2	9	7	1	1	1	1	1	1	4	1	2	2	1	36
N. glauca	1	1	2	9	8	1	1	1	1	1	1	4	1	2	2	1	37
N. tabacum cv. TN90	1	1	2	9	6	1	1	1	1	1	1	4	1	2	2	1	35
N. occidentalis subsp. obliqua	1	1	2	9	7	1	1	1	1	1	1	4	1	2	2	1	36
N. undulata	1	1	1	9	7	1	1	1	1	1	1	4	1	2	2	1	35
Total	24	24	50	216	165	24	24	24	24	24	24	96	25	49	48	24	865
