# Supplementary material for: Comparative Chloroplast Genomes of Nicotiana Species (Solanaceae): Insights Into the Genetic Variation, Phylogenetic Relationship, and Polyploid Speciation
Source: Front Plant Sci. 2022 Jul 4;13:899252. doi: 10.3389/fpls.2022.899252 (PMC9295722; doi:10.3389/fpls.2022.899252)
Supplement: Supplementary file 2 [file Table_2.XLSX]

## Sheet: Table S2
Table S2 Putative RNA editing sites in the 24 chloroplast genomes of Nicotiana species.
Spacies	Nucleotide Position	Amino acid (AA) Position	Alignment Column	Effect	Score	Gene
N. tabacum cv. K326	248	83	83	TCA (S) => TTA (L)	1	rps2
N. tabacum cv. K326	62	21	21	TCA (S) => TTA (L)	1	rpoC1
N. tabacum cv. K326	2287	763	948	CGG (R) => TGG (W)	1	rpoC2
N. tabacum cv. K326	3731	1244	1450	TCA (S) => TTA (L)	0.86	rpoC2
N. tabacum cv. K326	308	103	103	TCA (S) => TTA (L)	0.86	rpl20
N. tabacum cv. K326	2	1	1	ACG (T) => ATG (M)	1	psbL
N. tabacum cv. K326	611	204	204	CCA (P) => CTA (L)	1	petB
N. tabacum cv. K326	80	27	27	TCA (S) => TTA (L)	1	rps14
N. tabacum cv. K326	149	50	53	CCA (P) => CTA (L)	1	rps14
N. tabacum cv. K326	149	50	50	TCA (S) => TTA (L)	1	ndhB
N. tabacum cv. K326	467	156	156	CCA (P) => CTA (L)	1	ndhB
N. tabacum cv. K326	586	196	196	CAT (H) => TAT (Y)	1	ndhB
N. tabacum cv. K326	611	204	204	TCA (S) => TTA (L)	0.8	ndhB
N. tabacum cv. K326	737	246	246	CCA (P) => CTA (L)	1	ndhB
N. tabacum cv. K326	746	249	249	TCT (S) => TTT (F)	1	ndhB
N. tabacum cv. K326	830	277	277	TCA (S) => TTA (L)	1	ndhB
N. tabacum cv. K326	836	279	279	TCA (S) => TTA (L)	1	ndhB
N. tabacum cv. K326	1481	494	494	CCA (P) => CTA (L)	1	ndhB
N. tabacum cv. K326	92	31	31	CCA (P) => CTA (L)	0.86	atpF
N. tabacum cv. K326	830	277	279	TCA (S) => TTA (L)	1	rpoA
N. tabacum cv. K326	791	264	264	CCC (P) => CTC (L)	1	atpA
N. tabacum cv. K326	2	1	1	ACG (T) => ATG (M)	1	ndhD
N. tabacum cv. K326	383	128	128	TCA (S) => TTA (L)	1	ndhD
N. tabacum cv. K326	599	200	200	TCA (S) => TTA (L)	1	ndhD
N. tabacum cv. K326	674	225	225	TCG (S) => TTG (L)	1	ndhD
N. tabacum cv. K326	1298	433	433	TCA (S) => TTA (L)	0.8	ndhD
N. tabacum cv. K326	1310	437	437	TCA (S) => TTA (L)	0.8	ndhD
N. tabacum cv. K326	214	72	72	CCT (P) => TCT (S)	1	psbE
N. tabacum cv. K326	290	97	97	TCA (S) => TTA (L)	1	ndhF
N. tabacum cv. K326	341	114	114	TCA (S) => TTA (L)	1	ndhA
N. tabacum cv. K326	1073	358	358	TCC (S) => TTC (F)	1	ndhA
N. tabacum cv. K326	338	113	113	TCT (S) => TTT (F)	1	rpoB
N. tabacum cv. K326	473	158	159	TCA (S) => TTA (L)	0.86	rpoB
N. tabacum cv. K326	551	184	185	TCA (S) => TTA (L)	1	rpoB
N. tabacum cv. K326	2000	667	684	TCT (S) => TTT (F)	1	rpoB
N. tabacum cv. Basma Xanthi	248	83	83	TCA (S) => TTA (L)	1	rps2
N. tabacum cv. Basma Xanthi	62	21	21	TCA (S) => TTA (L)	1	rpoC1
N. tabacum cv. Basma Xanthi	2287	763	948	CGG (R) => TGG (W)	1	rpoC2
N. tabacum cv. Basma Xanthi	3731	1244	1450	TCA (S) => TTA (L)	0.86	rpoC2
N. tabacum cv. Basma Xanthi	308	103	103	TCA (S) => TTA (L)	0.86	rpl20
N. tabacum cv. Basma Xanthi	2	1	1	ACG (T) => ATG (M)	1	psbL
N. tabacum cv. Basma Xanthi	611	204	204	CCA (P) => CTA (L)	1	petB
N. tabacum cv. Basma Xanthi	80	27	27	TCA (S) => TTA (L)	1	rps14
N. tabacum cv. Basma Xanthi	149	50	53	CCA (P) => CTA (L)	1	rps14
N. tabacum cv. Basma Xanthi	149	50	50	TCA (S) => TTA (L)	1	ndhB
N. tabacum cv. Basma Xanthi	467	156	156	CCA (P) => CTA (L)	1	ndhB
N. tabacum cv. Basma Xanthi	586	196	196	CAT (H) => TAT (Y)	1	ndhB
N. tabacum cv. Basma Xanthi	611	204	204	TCA (S) => TTA (L)	0.8	ndhB
N. tabacum cv. Basma Xanthi	737	246	246	CCA (P) => CTA (L)	1	ndhB
N. tabacum cv. Basma Xanthi	746	249	249	TCT (S) => TTT (F)	1	ndhB
N. tabacum cv. Basma Xanthi	830	277	277	TCA (S) => TTA (L)	1	ndhB
N. tabacum cv. Basma Xanthi	836	279	279	TCA (S) => TTA (L)	1	ndhB
N. tabacum cv. Basma Xanthi	1481	494	494	CCA (P) => CTA (L)	1	ndhB
N. tabacum cv. Basma Xanthi	830	277	279	TCA (S) => TTA (L)	1	rpoA
N. tabacum cv. Basma Xanthi	92	31	31	CCA (P) => CTA (L)	0.86	atpF
N. tabacum cv. Basma Xanthi	2	1	1	ACG (T) => ATG (M)	1	ndhD
N. tabacum cv. Basma Xanthi	383	128	128	TCA (S) => TTA (L)	1	ndhD
N. tabacum cv. Basma Xanthi	599	200	200	TCA (S) => TTA (L)	1	ndhD
N. tabacum cv. Basma Xanthi	674	225	225	TCG (S) => TTG (L)	1	ndhD
N. tabacum cv. Basma Xanthi	1298	433	433	TCA (S) => TTA (L)	0.8	ndhD
N. tabacum cv. Basma Xanthi	1310	437	437	TCA (S) => TTA (L)	0.8	ndhD
N. tabacum cv. Basma Xanthi	791	264	264	CCC (P) => CTC (L)	1	atpA
N. tabacum cv. Basma Xanthi	214	72	72	CCT (P) => TCT (S)	1	psbE
N. tabacum cv. Basma Xanthi	290	97	97	TCA (S) => TTA (L)	1	ndhF
N. tabacum cv. Basma Xanthi	341	114	114	TCA (S) => TTA (L)	1	ndhA
N. tabacum cv. Basma Xanthi	1073	358	358	TCC (S) => TTC (F)	1	ndhA
N. tabacum cv. Basma Xanthi	338	113	113	TCT (S) => TTT (F)	1	rpoB
N. tabacum cv. Basma Xanthi	473	158	159	TCA (S) => TTA (L)	0.86	rpoB
N. tabacum cv. Basma Xanthi	551	184	185	TCA (S) => TTA (L)	1	rpoB
N. tabacum cv. Basma Xanthi	2000	667	684	TCT (S) => TTT (F)	1	rpoB
N. rosulata subsp. rosulata	338	113	113	TCT (S) => TTT (F)	1	rpoB
N. rosulata subsp. rosulata	473	158	159	TCA (S) => TTA (L)	0.86	rpoB
N. rosulata subsp. rosulata	551	184	185	TCA (S) => TTA (L)	1	rpoB
N. rosulata subsp. rosulata	2000	667	684	TCT (S) => TTT (F)	1	rpoB
N. rosulata subsp. rosulata	2287	763	948	CGG (R) => TGG (W)	1	rpoC2
N. rosulata subsp. rosulata	3731	1244	1450	TCA (S) => TTA (L)	0.86	rpoC2
N. rosulata subsp. rosulata	290	97	97	TCA (S) => TTA (L)	1	ndhF
N. rosulata subsp. rosulata	308	103	103	TCA (S) => TTA (L)	0.86	rpl20
N. rosulata subsp. rosulata	341	114	114	TCA (S) => TTA (L)	1	ndhA
N. rosulata subsp. rosulata	1073	358	358	TCC (S) => TTC (F)	1	ndhA
N. rosulata subsp. rosulata	830	277	279	TCA (S) => TTA (L)	1	rpoA
N. rosulata subsp. rosulata	92	31	31	CCA (P) => CTA (L)	0.86	atpF
N. rosulata subsp. rosulata	2	1	1	ACG (T) => ATG (M)	1	ndhD
N. rosulata subsp. rosulata	383	128	128	TCA (S) => TTA (L)	1	ndhD
N. rosulata subsp. rosulata	599	200	200	TCA (S) => TTA (L)	1	ndhD
N. rosulata subsp. rosulata	674	225	225	TCG (S) => TTG (L)	1	ndhD
N. rosulata subsp. rosulata	878	293	293	TCA (S) => TTA (L)	1	ndhD
N. rosulata subsp. rosulata	1298	433	433	TCA (S) => TTA (L)	0.8	ndhD
N. rosulata subsp. rosulata	1310	437	437	TCA (S) => TTA (L)	0.8	ndhD
N. rosulata subsp. rosulata	791	264	264	CCC (P) => CTC (L)	1	atpA
N. rosulata subsp. rosulata	214	72	72	CCT (P) => TCT (S)	1	psbE
N. rosulata subsp. rosulata	62	21	21	TCA (S) => TTA (L)	1	rpoC1
N. rosulata subsp. rosulata	2	1	1	ACG (T) => ATG (M)	1	psbL
N. rosulata subsp. rosulata	611	204	204	CCA (P) => CTA (L)	1	petB
N. rosulata subsp. rosulata	149	50	50	TCA (S) => TTA (L)	1	ndhB
N. rosulata subsp. rosulata	467	156	156	CCA (P) => CTA (L)	1	ndhB
N. rosulata subsp. rosulata	586	196	196	CAT (H) => TAT (Y)	1	ndhB
N. rosulata subsp. rosulata	611	204	204	TCA (S) => TTA (L)	0.8	ndhB
N. rosulata subsp. rosulata	737	246	246	CCA (P) => CTA (L)	1	ndhB
N. rosulata subsp. rosulata	746	249	249	TCT (S) => TTT (F)	1	ndhB
N. rosulata subsp. rosulata	830	277	277	TCA (S) => TTA (L)	1	ndhB
N. rosulata subsp. rosulata	836	279	279	TCA (S) => TTA (L)	1	ndhB
N. rosulata subsp. rosulata	1481	494	494	CCA (P) => CTA (L)	1	ndhB
N. rosulata subsp. rosulata	80	27	27	TCA (S) => TTA (L)	1	rps14
N. rosulata subsp. rosulata	149	50	53	CCA (P) => CTA (L)	1	rps14
N. rosulata subsp. rosulata	248	83	83	TCA (S) => TTA (L)	1	rps2
N. paniculata	248	83	83	TCA (S) => TTA (L)	1	rps2
N. paniculata	80	27	27	TCA (S) => TTA (L)	1	rps14
N. paniculata	149	50	53	CCA (P) => CTA (L)	1	rps14
N. paniculata	791	264	264	CCC (P) => CTC (L)	1	atpA
N. paniculata	2	1	1	ACG (T) => ATG (M)	1	ndhD
N. paniculata	383	128	128	TCA (S) => TTA (L)	1	ndhD
N. paniculata	599	200	200	TCA (S) => TTA (L)	1	ndhD
N. paniculata	674	225	225	TCG (S) => TTG (L)	1	ndhD
N. paniculata	878	293	293	TCA (S) => TTA (L)	1	ndhD
N. paniculata	1298	433	433	TCA (S) => TTA (L)	0.8	ndhD
N. paniculata	1310	437	437	TCA (S) => TTA (L)	0.8	ndhD
N. paniculata	214	72	72	CCT (P) => TCT (S)	1	psbE
N. paniculata	92	31	31	CCA (P) => CTA (L)	0.86	atpF
N. paniculata	830	277	279	TCA (S) => TTA (L)	1	rpoA
N. paniculata	308	103	103	TCA (S) => TTA (L)	0.86	rpl20
N. paniculata	611	204	204	CCA (P) => CTA (L)	1	petB
N. paniculata	2287	763	948	CGG (R) => TGG (W)	1	rpoC2
N. paniculata	3731	1244	1450	TCA (S) => TTA (L)	0.86	rpoC2
N. paniculata	149	50	50	TCA (S) => TTA (L)	1	ndhB
N. paniculata	467	156	156	CCA (P) => CTA (L)	1	ndhB
N. paniculata	586	196	196	CAT (H) => TAT (Y)	1	ndhB
N. paniculata	611	204	204	TCA (S) => TTA (L)	0.8	ndhB
N. paniculata	737	246	246	CCA (P) => CTA (L)	1	ndhB
N. paniculata	746	249	249	TCT (S) => TTT (F)	1	ndhB
N. paniculata	830	277	277	TCA (S) => TTA (L)	1	ndhB
N. paniculata	836	279	279	TCA (S) => TTA (L)	1	ndhB
N. paniculata	1481	494	494	CCA (P) => CTA (L)	1	ndhB
N. paniculata	2	1	1	ACG (T) => ATG (M)	1	psbL
N. paniculata	338	113	113	TCT (S) => TTT (F)	1	rpoB
N. paniculata	473	158	159	TCA (S) => TTA (L)	0.86	rpoB
N. paniculata	551	184	185	TCA (S) => TTA (L)	1	rpoB
N. paniculata	2000	667	684	TCT (S) => TTT (F)	1	rpoB
N. paniculata	62	21	21	TCA (S) => TTA (L)	1	rpoC1
N. paniculata	341	114	114	TCA (S) => TTA (L)	1	ndhA
N. paniculata	1073	358	358	TCC (S) => TTC (F)	1	ndhA
N. paniculata	290	97	97	TCA (S) => TTA (L)	1	ndhF
N. cavicola	308	103	103	TCA (S) => TTA (L)	0.86	rpl20
N. cavicola	2287	763	948	CGG (R) => TGG (W)	1	rpoC2
N. cavicola	3731	1244	1450	TCA (S) => TTA (L)	0.86	rpoC2
N. cavicola	92	31	31	CCA (P) => CTA (L)	0.86	atpF
N. cavicola	830	277	279	TCA (S) => TTA (L)	1	rpoA
N. cavicola	214	72	72	CCT (P) => TCT (S)	1	psbE
N. cavicola	791	264	264	CCC (P) => CTC (L)	1	atpA
N. cavicola	2	1	1	ACG (T) => ATG (M)	1	ndhD
N. cavicola	383	128	128	TCA (S) => TTA (L)	1	ndhD
N. cavicola	599	200	200	TCA (S) => TTA (L)	1	ndhD
N. cavicola	674	225	225	TCG (S) => TTG (L)	1	ndhD
N. cavicola	878	293	293	TCA (S) => TTA (L)	1	ndhD
N. cavicola	1298	433	433	TCA (S) => TTA (L)	0.8	ndhD
N. cavicola	1310	437	437	TCA (S) => TTA (L)	0.8	ndhD
N. cavicola	2	1	1	ACG (T) => ATG (M)	1	psbL
N. cavicola	149	50	50	TCA (S) => TTA (L)	1	ndhB
N. cavicola	467	156	156	CCA (P) => CTA (L)	1	ndhB
N. cavicola	586	196	196	CAT (H) => TAT (Y)	1	ndhB
N. cavicola	611	204	204	TCA (S) => TTA (L)	0.8	ndhB
N. cavicola	737	246	246	CCA (P) => CTA (L)	1	ndhB
N. cavicola	746	249	249	TCT (S) => TTT (F)	1	ndhB
N. cavicola	830	277	277	TCA (S) => TTA (L)	1	ndhB
N. cavicola	836	279	279	TCA (S) => TTA (L)	1	ndhB
N. cavicola	1481	494	494	CCA (P) => CTA (L)	1	ndhB
N. cavicola	611	204	204	CCA (P) => CTA (L)	1	petB
N. cavicola	338	113	113	TCT (S) => TTT (F)	1	rpoB
N. cavicola	473	158	159	TCA (S) => TTA (L)	0.86	rpoB
N. cavicola	551	184	185	TCA (S) => TTA (L)	1	rpoB
N. cavicola	2000	667	684	TCT (S) => TTT (F)	1	rpoB
N. cavicola	62	21	21	TCA (S) => TTA (L)	1	rpoC1
N. cavicola	290	97	97	TCA (S) => TTA (L)	1	ndhF
N. cavicola	50	17	17	TCG (S) => TTG (L)	1	ndhA
N. cavicola	341	114	114	TCA (S) => TTA (L)	1	ndhA
N. cavicola	1073	358	358	TCC (S) => TTC (F)	1	ndhA
N. cavicola	248	83	83	TCA (S) => TTA (L)	1	rps2
N. cavicola	80	27	27	TCA (S) => TTA (L)	1	rps14
N. cavicola	149	50	53	CCA (P) => CTA (L)	1	rps14
N. nesophila	338	113	113	TCT (S) => TTT (F)	1	rpoB
N. nesophila	473	158	159	TCA (S) => TTA (L)	0.86	rpoB
N. nesophila	551	184	185	TCA (S) => TTA (L)	1	rpoB
N. nesophila	2000	667	684	TCT (S) => TTT (F)	1	rpoB
N. nesophila	341	114	114	TCA (S) => TTA (L)	1	ndhA
N. nesophila	1073	358	358	TCC (S) => TTC (F)	1	ndhA
N. nesophila	62	21	21	TCA (S) => TTA (L)	1	rpoC1
N. nesophila	290	97	97	TCA (S) => TTA (L)	1	ndhF
N. nesophila	214	72	72	CCT (P) => TCT (S)	1	psbE
N. nesophila	791	264	264	CCC (P) => CTC (L)	1	atpA
N. nesophila	2	1	1	ACG (T) => ATG (M)	1	ndhD
N. nesophila	383	128	128	TCA (S) => TTA (L)	1	ndhD
N. nesophila	599	200	200	TCA (S) => TTA (L)	1	ndhD
N. nesophila	674	225	225	TCG (S) => TTG (L)	1	ndhD
N. nesophila	878	293	293	TCA (S) => TTA (L)	1	ndhD
N. nesophila	1298	433	433	TCA (S) => TTA (L)	0.8	ndhD
N. nesophila	1310	437	437	TCA (S) => TTA (L)	0.8	ndhD
N. nesophila	92	31	31	CCA (P) => CTA (L)	0.86	atpF
N. nesophila	830	277	279	TCA (S) => TTA (L)	1	rpoA
N. nesophila	2287	763	948	CGG (R) => TGG (W)	1	rpoC2
N. nesophila	3731	1244	1450	TCA (S) => TTA (L)	0.86	rpoC2
N. nesophila	149	50	50	TCA (S) => TTA (L)	1	ndhB
N. nesophila	467	156	156	CCA (P) => CTA (L)	1	ndhB
N. nesophila	586	196	196	CAT (H) => TAT (Y)	1	ndhB
N. nesophila	611	204	204	TCA (S) => TTA (L)	0.8	ndhB
N. nesophila	737	246	246	CCA (P) => CTA (L)	1	ndhB
N. nesophila	746	249	249	TCT (S) => TTT (F)	1	ndhB
N. nesophila	830	277	277	TCA (S) => TTA (L)	1	ndhB
N. nesophila	836	279	279	TCA (S) => TTA (L)	1	ndhB
N. nesophila	1481	494	494	CCA (P) => CTA (L)	1	ndhB
N. nesophila	611	204	204	CCA (P) => CTA (L)	1	petB
N. nesophila	308	103	103	TCA (S) => TTA (L)	0.86	rpl20
N. nesophila	2	1	1	ACG (T) => ATG (M)	1	psbL
N. nesophila	80	27	27	TCA (S) => TTA (L)	1	rps14
N. nesophila	149	50	53	CCA (P) => CTA (L)	1	rps14
N. nesophila	248	83	83	TCA (S) => TTA (L)	1	rps2
N. occidentalis subsp. occidentalis	92	31	31	CCA (P) => CTA (L)	0.86	atpF
N. occidentalis subsp. occidentalis	830	277	279	TCA (S) => TTA (L)	1	rpoA
N. occidentalis subsp. occidentalis	2287	763	948	CGG (R) => TGG (W)	1	rpoC2
N. occidentalis subsp. occidentalis	3731	1244	1450	TCA (S) => TTA (L)	0.86	rpoC2
N. occidentalis subsp. occidentalis	791	264	264	CCC (P) => CTC (L)	1	atpA
N. occidentalis subsp. occidentalis	2	1	1	ACG (T) => ATG (M)	1	ndhD
N. occidentalis subsp. occidentalis	383	128	128	TCA (S) => TTA (L)	1	ndhD
N. occidentalis subsp. occidentalis	599	200	200	TCA (S) => TTA (L)	1	ndhD
N. occidentalis subsp. occidentalis	674	225	225	TCG (S) => TTG (L)	1	ndhD
N. occidentalis subsp. occidentalis	878	293	293	TCA (S) => TTA (L)	1	ndhD
N. occidentalis subsp. occidentalis	1298	433	433	TCA (S) => TTA (L)	0.8	ndhD
N. occidentalis subsp. occidentalis	1310	437	437	TCA (S) => TTA (L)	0.8	ndhD
N. occidentalis subsp. occidentalis	308	103	103	TCA (S) => TTA (L)	0.86	rpl20
N. occidentalis subsp. occidentalis	214	72	72	CCT (P) => TCT (S)	1	psbE
N. occidentalis subsp. occidentalis	2	1	1	ACG (T) => ATG (M)	1	psbL
N. occidentalis subsp. occidentalis	611	204	204	CCA (P) => CTA (L)	1	petB
N. occidentalis subsp. occidentalis	149	50	50	TCA (S) => TTA (L)	1	ndhB
N. occidentalis subsp. occidentalis	467	156	156	CCA (P) => CTA (L)	1	ndhB
N. occidentalis subsp. occidentalis	586	196	196	CAT (H) => TAT (Y)	1	ndhB
N. occidentalis subsp. occidentalis	611	204	204	TCA (S) => TTA (L)	0.8	ndhB
N. occidentalis subsp. occidentalis	737	246	246	CCA (P) => CTA (L)	1	ndhB
N. occidentalis subsp. occidentalis	746	249	249	TCT (S) => TTT (F)	1	ndhB
N. occidentalis subsp. occidentalis	830	277	277	TCA (S) => TTA (L)	1	ndhB
N. occidentalis subsp. occidentalis	836	279	279	TCA (S) => TTA (L)	1	ndhB
N. occidentalis subsp. occidentalis	1481	494	494	CCA (P) => CTA (L)	1	ndhB
N. occidentalis subsp. occidentalis	338	113	113	TCT (S) => TTT (F)	1	rpoB
N. occidentalis subsp. occidentalis	473	158	159	TCA (S) => TTA (L)	0.86	rpoB
N. occidentalis subsp. occidentalis	551	184	185	TCA (S) => TTA (L)	1	rpoB
N. occidentalis subsp. occidentalis	2000	667	684	TCT (S) => TTT (F)	1	rpoB
N. occidentalis subsp. occidentalis	62	21	21	TCA (S) => TTA (L)	1	rpoC1
N. occidentalis subsp. occidentalis	290	97	97	TCA (S) => TTA (L)	1	ndhF
N. occidentalis subsp. occidentalis	341	114	114	TCA (S) => TTA (L)	1	ndhA
N. occidentalis subsp. occidentalis	1073	358	358	TCC (S) => TTC (F)	1	ndhA
N. occidentalis subsp. occidentalis	248	83	83	TCA (S) => TTA (L)	1	rps2
N. occidentalis subsp. occidentalis	80	27	27	TCA (S) => TTA (L)	1	rps14
N. occidentalis subsp. occidentalis	149	50	53	CCA (P) => CTA (L)	1	rps14
N. rustica	149	50	50	TCA (S) => TTA (L)	1	ndhB
N. rustica	467	156	156	CCA (P) => CTA (L)	1	ndhB
N. rustica	586	196	196	CAT (H) => TAT (Y)	1	ndhB
N. rustica	611	204	204	TCA (S) => TTA (L)	0.8	ndhB
N. rustica	737	246	246	CCA (P) => CTA (L)	1	ndhB
N. rustica	746	249	249	TCT (S) => TTT (F)	1	ndhB
N. rustica	830	277	277	TCA (S) => TTA (L)	1	ndhB
N. rustica	836	279	279	TCA (S) => TTA (L)	1	ndhB
N. rustica	1481	494	494	CCA (P) => CTA (L)	1	ndhB
N. rustica	611	204	204	CCA (P) => CTA (L)	1	petB
N. rustica	2	1	1	ACG (T) => ATG (M)	1	psbL
N. rustica	214	72	72	CCT (P) => TCT (S)	1	psbE
N. rustica	2	1	1	ACG (T) => ATG (M)	1	ndhD
N. rustica	383	128	128	TCA (S) => TTA (L)	1	ndhD
N. rustica	599	200	200	TCA (S) => TTA (L)	1	ndhD
N. rustica	674	225	225	TCG (S) => TTG (L)	1	ndhD
N. rustica	878	293	293	TCA (S) => TTA (L)	1	ndhD
N. rustica	1298	433	433	TCA (S) => TTA (L)	0.8	ndhD
N. rustica	1310	437	437	TCA (S) => TTA (L)	0.8	ndhD
N. rustica	791	264	264	CCC (P) => CTC (L)	1	atpA
N. rustica	830	277	279	TCA (S) => TTA (L)	1	rpoA
N. rustica	92	31	31	CCA (P) => CTA (L)	0.86	atpF
N. rustica	62	21	21	TCA (S) => TTA (L)	1	rpoC1
N. rustica	341	114	114	TCA (S) => TTA (L)	1	ndhA
N. rustica	1073	358	358	TCC (S) => TTC (F)	1	ndhA
N. rustica	290	97	97	TCA (S) => TTA (L)	1	ndhF
N. rustica	338	113	113	TCT (S) => TTT (F)	1	rpoB
N. rustica	473	158	159	TCA (S) => TTA (L)	0.86	rpoB
N. rustica	551	184	185	TCA (S) => TTA (L)	1	rpoB
N. rustica	2000	667	684	TCT (S) => TTT (F)	1	rpoB
N. rustica	2287	763	948	CGG (R) => TGG (W)	1	rpoC2
N. rustica	3731	1244	1450	TCA (S) => TTA (L)	0.86	rpoC2
N. rustica	308	103	103	TCA (S) => TTA (L)	0.86	rpl20
N. rustica	248	83	83	TCA (S) => TTA (L)	1	rps2
N. rustica	80	27	27	TCA (S) => TTA (L)	1	rps14
N. rustica	149	50	53	CCA (P) => CTA (L)	1	rps14
N. nudicaulis	80	27	27	TCA (S) => TTA (L)	1	rps14
N. nudicaulis	149	50	53	CCA (P) => CTA (L)	1	rps14
N. nudicaulis	248	83	83	TCA (S) => TTA (L)	1	rps2
N. nudicaulis	338	113	113	TCT (S) => TTT (F)	1	rpoB
N. nudicaulis	473	158	159	TCA (S) => TTA (L)	0.86	rpoB
N. nudicaulis	551	184	185	TCA (S) => TTA (L)	1	rpoB
N. nudicaulis	2000	667	684	TCT (S) => TTT (F)	1	rpoB
N. nudicaulis	341	114	114	TCA (S) => TTA (L)	1	ndhA
N. nudicaulis	1073	358	358	TCC (S) => TTC (F)	1	ndhA
N. nudicaulis	290	97	97	TCA (S) => TTA (L)	1	ndhF
N. nudicaulis	2287	763	948	CGG (R) => TGG (W)	1	rpoC2
N. nudicaulis	3731	1244	1450	TCA (S) => TTA (L)	0.86	rpoC2
N. nudicaulis	308	103	103	TCA (S) => TTA (L)	0.86	rpl20
N. nudicaulis	2	1	1	ACG (T) => ATG (M)	1	ndhD
N. nudicaulis	383	128	128	TCA (S) => TTA (L)	1	ndhD
N. nudicaulis	599	200	200	TCA (S) => TTA (L)	1	ndhD
N. nudicaulis	674	225	225	TCG (S) => TTG (L)	1	ndhD
N. nudicaulis	878	293	293	TCA (S) => TTA (L)	1	ndhD
N. nudicaulis	1298	433	433	TCA (S) => TTA (L)	0.8	ndhD
N. nudicaulis	1310	437	437	TCA (S) => TTA (L)	0.8	ndhD
N. nudicaulis	791	264	264	CCC (P) => CTC (L)	1	atpA
N. nudicaulis	214	72	72	CCT (P) => TCT (S)	1	psbE
N. nudicaulis	92	31	31	CCA (P) => CTA (L)	0.86	atpF
N. nudicaulis	830	277	279	TCA (S) => TTA (L)	1	rpoA
N. nudicaulis	611	204	204	CCA (P) => CTA (L)	1	petB
N. nudicaulis	149	50	50	TCA (S) => TTA (L)	1	ndhB
N. nudicaulis	467	156	156	CCA (P) => CTA (L)	1	ndhB
N. nudicaulis	586	196	196	CAT (H) => TAT (Y)	1	ndhB
N. nudicaulis	611	204	204	TCA (S) => TTA (L)	0.8	ndhB
N. nudicaulis	737	246	246	CCA (P) => CTA (L)	1	ndhB
N. nudicaulis	746	249	249	TCT (S) => TTT (F)	1	ndhB
N. nudicaulis	830	277	277	TCA (S) => TTA (L)	1	ndhB
N. nudicaulis	836	279	279	TCA (S) => TTA (L)	1	ndhB
N. nudicaulis	1481	494	494	CCA (P) => CTA (L)	1	ndhB
N. nudicaulis	2	1	1	ACG (T) => ATG (M)	1	psbL
N. nudicaulis	62	21	21	TCA (S) => TTA (L)	1	rpoC1
N. tomentosiformis	80	27	27	TCA (S) => TTA (L)	1	rps14
N. tomentosiformis	149	50	53	CCA (P) => CTA (L)	1	rps14
N. tomentosiformis	338	113	113	TCT (S) => TTT (F)	1	rpoB
N. tomentosiformis	473	158	159	TCA (S) => TTA (L)	0.86	rpoB
N. tomentosiformis	551	184	185	TCA (S) => TTA (L)	1	rpoB
N. tomentosiformis	2000	667	684	TCT (S) => TTT (F)	1	rpoB
N. tomentosiformis	290	97	97	TCA (S) => TTA (L)	1	ndhF
N. tomentosiformis	341	114	114	TCA (S) => TTA (L)	1	ndhA
N. tomentosiformis	566	189	189	TCA (S) => TTA (L)	1	ndhA
N. tomentosiformis	1073	358	358	TCC (S) => TTC (F)	1	ndhA
N. tomentosiformis	92	31	31	CCA (P) => CTA (L)	0.86	atpF
N. tomentosiformis	830	277	279	TCA (S) => TTA (L)	1	rpoA
N. tomentosiformis	2	1	1	ACG (T) => ATG (M)	1	ndhD
N. tomentosiformis	383	128	128	TCA (S) => TTA (L)	1	ndhD
N. tomentosiformis	599	200	200	TCA (S) => TTA (L)	1	ndhD
N. tomentosiformis	674	225	225	TCG (S) => TTG (L)	1	ndhD
N. tomentosiformis	878	293	293	TCA (S) => TTA (L)	1	ndhD
N. tomentosiformis	1298	433	433	TCA (S) => TTA (L)	0.8	ndhD
N. tomentosiformis	1310	437	437	TCA (S) => TTA (L)	0.8	ndhD
N. tomentosiformis	791	264	264	CCC (P) => CTC (L)	1	atpA
N. tomentosiformis	214	72	72	CCT (P) => TCT (S)	1	psbE
N. tomentosiformis	2	1	1	ACG (T) => ATG (M)	1	psbL
N. tomentosiformis	611	204	204	CCA (P) => CTA (L)	1	petB
N. tomentosiformis	149	50	50	TCA (S) => TTA (L)	1	ndhB
N. tomentosiformis	467	156	156	CCA (P) => CTA (L)	1	ndhB
N. tomentosiformis	586	196	196	CAT (H) => TAT (Y)	1	ndhB
N. tomentosiformis	611	204	204	TCA (S) => TTA (L)	0.8	ndhB
N. tomentosiformis	737	246	246	CCA (P) => CTA (L)	1	ndhB
N. tomentosiformis	746	249	249	TCT (S) => TTT (F)	1	ndhB
N. tomentosiformis	830	277	277	TCA (S) => TTA (L)	1	ndhB
N. tomentosiformis	836	279	279	TCA (S) => TTA (L)	1	ndhB
N. tomentosiformis	1481	494	494	CCA (P) => CTA (L)	1	ndhB
N. tomentosiformis	62	21	21	TCA (S) => TTA (L)	1	rpoC1
N. tomentosiformis	2287	763	948	CGG (R) => TGG (W)	1	rpoC2
N. tomentosiformis	3731	1244	1450	TCA (S) => TTA (L)	0.86	rpoC2
N. tomentosiformis	248	83	83	TCA (S) => TTA (L)	1	rps2
N. tomentosiformis	308	103	103	TCA (S) => TTA (L)	0.86	rpl20
N. obtusifolia	248	83	83	TCA (S) => TTA (L)	1	rps2
N. obtusifolia	59	20	20	TCA (S) => TTA (L)	1	rpoC1
N. obtusifolia	2287	763	948	CGG (R) => TGG (W)	1	rpoC2
N. obtusifolia	3731	1244	1450	TCA (S) => TTA (L)	0.86	rpoC2
N. obtusifolia	308	103	103	TCA (S) => TTA (L)	0.86	rpl20
N. obtusifolia	2	1	1	ACG (T) => ATG (M)	1	psbL
N. obtusifolia	80	27	27	TCA (S) => TTA (L)	1	rps14
N. obtusifolia	149	50	53	CCA (P) => CTA (L)	1	rps14
N. obtusifolia	611	204	204	CCA (P) => CTA (L)	1	petB
N. obtusifolia	149	50	50	TCA (S) => TTA (L)	1	ndhB
N. obtusifolia	467	156	156	CCA (P) => CTA (L)	1	ndhB
N. obtusifolia	586	196	196	CAT (H) => TAT (Y)	1	ndhB
N. obtusifolia	611	204	204	TCA (S) => TTA (L)	0.8	ndhB
N. obtusifolia	737	246	246	CCA (P) => CTA (L)	1	ndhB
N. obtusifolia	746	249	249	TCT (S) => TTT (F)	1	ndhB
N. obtusifolia	830	277	277	TCA (S) => TTA (L)	1	ndhB
N. obtusifolia	836	279	279	TCA (S) => TTA (L)	1	ndhB
N. obtusifolia	1481	494	494	CCA (P) => CTA (L)	1	ndhB
N. obtusifolia	92	31	31	CCA (P) => CTA (L)	0.86	atpF
N. obtusifolia	830	277	279	TCA (S) => TTA (L)	1	rpoA
N. obtusifolia	2	1	1	ACG (T) => ATG (M)	1	ndhD
N. obtusifolia	383	128	128	TCA (S) => TTA (L)	1	ndhD
N. obtusifolia	599	200	200	TCA (S) => TTA (L)	1	ndhD
N. obtusifolia	674	225	225	TCG (S) => TTG (L)	1	ndhD
N. obtusifolia	878	293	293	TCA (S) => TTA (L)	1	ndhD
N. obtusifolia	1298	433	433	TCA (S) => TTA (L)	0.8	ndhD
N. obtusifolia	1310	437	437	TCA (S) => TTA (L)	0.8	ndhD
N. obtusifolia	791	264	264	CCC (P) => CTC (L)	1	atpA
N. obtusifolia	214	72	72	CCT (P) => TCT (S)	1	psbE
N. obtusifolia	290	97	97	TCA (S) => TTA (L)	1	ndhF
N. obtusifolia	341	114	114	TCA (S) => TTA (L)	1	ndhA
N. obtusifolia	1073	358	358	TCC (S) => TTC (F)	1	ndhA
N. obtusifolia	338	113	113	TCT (S) => TTT (F)	1	rpoB
N. obtusifolia	473	158	159	TCA (S) => TTA (L)	0.86	rpoB
N. obtusifolia	551	184	185	TCA (S) => TTA (L)	1	rpoB
N. obtusifolia	2000	667	684	TCT (S) => TTT (F)	1	rpoB
N. attenuata	53	18	18	GCC (A) => GTC (V)	1	ndhF
N. attenuata	290	97	97	TCA (S) => TTA (L)	1	ndhF
N. attenuata	341	114	114	TCA (S) => TTA (L)	1	ndhA
N. attenuata	1073	358	358	TCC (S) => TTC (F)	1	ndhA
N. attenuata	338	113	113	TCT (S) => TTT (F)	1	rpoB
N. attenuata	473	158	159	CCA (P) => CTA (L)	0.86	rpoB
N. attenuata	551	184	185	TCA (S) => TTA (L)	1	rpoB
N. attenuata	2000	667	684	TCT (S) => TTT (F)	1	rpoB
N. attenuata	308	103	103	TCA (S) => TTA (L)	0.86	rpl20
N. attenuata	2287	763	948	CGG (R) => TGG (W)	1	rpoC2
N. attenuata	3731	1244	1450	TCA (S) => TTA (L)	0.86	rpoC2
N. attenuata	2	1	1	ACG (T) => ATG (M)	1	psbL
N. attenuata	149	50	50	TCA (S) => TTA (L)	1	ndhB
N. attenuata	467	156	156	CCA (P) => CTA (L)	1	ndhB
N. attenuata	586	196	196	CAT (H) => TAT (Y)	1	ndhB
N. attenuata	611	204	204	TCA (S) => TTA (L)	0.8	ndhB
N. attenuata	737	246	246	CCA (P) => CTA (L)	1	ndhB
N. attenuata	746	249	249	TCT (S) => TTT (F)	1	ndhB
N. attenuata	830	277	277	TCA (S) => TTA (L)	1	ndhB
N. attenuata	836	279	279	TCA (S) => TTA (L)	1	ndhB
N. attenuata	1481	494	494	CCA (P) => CTA (L)	1	ndhB
N. attenuata	611	204	204	CCA (P) => CTA (L)	1	petB
N. attenuata	92	31	31	CCA (P) => CTA (L)	0.86	atpF
N. attenuata	830	277	279	TCA (S) => TTA (L)	1	rpoA
N. attenuata	59	20	20	TCA (S) => TTA (L)	1	rpoC1
N. attenuata	214	72	72	CCT (P) => TCT (S)	1	psbE
N. attenuata	416	139	139	GCC (A) => GTC (V)	0.86	petD
N. attenuata	2	1	1	ACG (T) => ATG (M)	1	ndhD
N. attenuata	383	128	128	TCA (S) => TTA (L)	1	ndhD
N. attenuata	599	200	200	TCA (S) => TTA (L)	1	ndhD
N. attenuata	674	225	225	TCG (S) => TTG (L)	1	ndhD
N. attenuata	878	293	293	TCA (S) => TTA (L)	1	ndhD
N. attenuata	1298	433	433	TCA (S) => TTA (L)	0.8	ndhD
N. attenuata	1310	437	437	TCA (S) => TTA (L)	0.8	ndhD
N. attenuata	791	264	264	CCC (P) => CTC (L)	1	atpA
N. attenuata	248	83	83	TCA (S) => TTA (L)	1	rps2
N. attenuata	80	27	27	TCA (S) => TTA (L)	1	rps14
N. attenuata	149	50	53	CCA (P) => CTA (L)	1	rps14
N. otophora	1501	501	533	CTT (L) => TTT (F)	1	accD
N. otophora	248	83	83	TCA (S) => TTA (L)	1	rps2
N. otophora	80	27	27	TCA (S) => TTA (L)	1	rps14
N. otophora	149	50	53	CCA (P) => CTA (L)	1	rps14
N. otophora	865	289	306	CTT (L) => TTT (F)	1	rpoC2
N. otophora	2287	763	948	CGG (R) => TGG (W)	1	rpoC2
N. otophora	3731	1244	1450	TCA (S) => TTA (L)	0.86	rpoC2
N. otophora	308	103	103	TCA (S) => TTA (L)	0.86	rpl20
N. otophora	341	114	114	TCA (S) => TTA (L)	1	ndhA
N. otophora	566	189	189	TCA (S) => TTA (L)	1	ndhA
N. otophora	1073	358	358	TCC (S) => TTC (F)	1	ndhA
N. otophora	338	113	113	TCT (S) => TTT (F)	1	rpoB
N. otophora	473	158	159	TCA (S) => TTA (L)	0.86	rpoB
N. otophora	551	184	185	TCA (S) => TTA (L)	1	rpoB
N. otophora	2000	667	684	TCT (S) => TTT (F)	1	rpoB
N. otophora	149	50	50	TCA (S) => TTA (L)	1	ndhB
N. otophora	467	156	156	CCA (P) => CTA (L)	1	ndhB
N. otophora	586	196	196	CAT (H) => TAT (Y)	1	ndhB
N. otophora	611	204	204	TCA (S) => TTA (L)	0.8	ndhB
N. otophora	737	246	246	CCA (P) => CTA (L)	1	ndhB
N. otophora	746	249	249	TCT (S) => TTT (F)	1	ndhB
N. otophora	830	277	277	TCA (S) => TTA (L)	1	ndhB
N. otophora	836	279	279	TCA (S) => TTA (L)	1	ndhB
N. otophora	1481	494	494	CCA (P) => CTA (L)	1	ndhB
N. otophora	611	204	204	CCA (P) => CTA (L)	1	petB
N. otophora	62	21	21	TCA (S) => TTA (L)	1	rpoC1
N. otophora	748	250	266	CTT (L) => TTT (F)	1	rpoC1
N. otophora	2	1	1	ACG (T) => ATG (M)	1	psbL
N. otophora	214	72	72	CCT (P) => TCT (S)	1	psbE
N. otophora	791	264	264	CCC (P) => CTC (L)	1	atpA
N. otophora	2	1	1	ACG (T) => ATG (M)	1	ndhD
N. otophora	383	128	128	TCA (S) => TTA (L)	1	ndhD
N. otophora	599	200	200	TCA (S) => TTA (L)	1	ndhD
N. otophora	674	225	225	TCG (S) => TTG (L)	1	ndhD
N. otophora	878	293	293	TCA (S) => TTA (L)	1	ndhD
N. otophora	1298	433	433	TCA (S) => TTA (L)	0.8	ndhD
N. otophora	1310	437	437	TCA (S) => TTA (L)	0.8	ndhD
N. otophora	92	31	31	CCA (P) => CTA (L)	0.86	atpF
N. otophora	830	277	279	TCA (S) => TTA (L)	1	rpoA
N. simulans	62	21	21	TCA (S) => TTA (L)	1	rpoC1
N. simulans	248	83	83	TCA (S) => TTA (L)	1	rps2
N. simulans	308	103	103	TCA (S) => TTA (L)	0.86	rpl20
N. simulans	2287	763	948	CGG (R) => TGG (W)	1	rpoC2
N. simulans	3731	1244	1450	TCA (S) => TTA (L)	0.86	rpoC2
N. simulans	80	27	27	TCA (S) => TTA (L)	1	rps14
N. simulans	149	50	53	CCA (P) => CTA (L)	1	rps14
N. simulans	341	114	114	TCA (S) => TTA (L)	1	ndhA
N. simulans	1073	358	358	TCC (S) => TTC (F)	1	ndhA
N. simulans	290	97	97	TCA (S) => TTA (L)	1	ndhF
N. simulans	338	113	113	TCT (S) => TTT (F)	1	rpoB
N. simulans	473	158	159	TCA (S) => TTA (L)	0.86	rpoB
N. simulans	551	184	185	TCA (S) => TTA (L)	1	rpoB
N. simulans	2000	667	684	TCT (S) => TTT (F)	1	rpoB
N. simulans	149	50	50	TCA (S) => TTA (L)	1	ndhB
N. simulans	467	156	156	CCA (P) => CTA (L)	1	ndhB
N. simulans	586	196	196	CAT (H) => TAT (Y)	1	ndhB
N. simulans	611	204	204	TCA (S) => TTA (L)	0.8	ndhB
N. simulans	737	246	246	CCA (P) => CTA (L)	1	ndhB
N. simulans	746	249	249	TCT (S) => TTT (F)	1	ndhB
N. simulans	830	277	277	TCA (S) => TTA (L)	1	ndhB
N. simulans	836	279	279	TCA (S) => TTA (L)	1	ndhB
N. simulans	1481	494	494	CCA (P) => CTA (L)	1	ndhB
N. simulans	611	204	204	CCA (P) => CTA (L)	1	petB
N. simulans	2	1	1	ACG (T) => ATG (M)	1	psbL
N. simulans	214	72	72	CCT (P) => TCT (S)	1	psbE
N. simulans	791	264	264	CCC (P) => CTC (L)	1	atpA
N. simulans	2	1	1	ACG (T) => ATG (M)	1	ndhD
N. simulans	383	128	128	TCA (S) => TTA (L)	1	ndhD
N. simulans	599	200	200	TCA (S) => TTA (L)	1	ndhD
N. simulans	674	225	225	TCG (S) => TTG (L)	1	ndhD
N. simulans	878	293	293	TCA (S) => TTA (L)	1	ndhD
N. simulans	1298	433	433	TCA (S) => TTA (L)	0.8	ndhD
N. simulans	1310	437	437	TCA (S) => TTA (L)	0.8	ndhD
N. simulans	92	31	31	CCA (P) => CTA (L)	0.86	atpF
N. simulans	830	277	279	TCA (S) => TTA (L)	1	rpoA
N. repanda	338	113	113	TCT (S) => TTT (F)	1	rpoB
N. repanda	473	158	159	TCA (S) => TTA (L)	0.86	rpoB
N. repanda	551	184	185	TCA (S) => TTA (L)	1	rpoB
N. repanda	2000	667	684	TCT (S) => TTT (F)	1	rpoB
N. repanda	341	114	114	TCA (S) => TTA (L)	1	ndhA
N. repanda	1073	358	358	TCC (S) => TTC (F)	1	ndhA
N. repanda	2287	763	948	CGG (R) => TGG (W)	1	rpoC2
N. repanda	3731	1244	1450	TCA (S) => TTA (L)	0.86	rpoC2
N. repanda	290	97	97	TCA (S) => TTA (L)	1	ndhF
N. repanda	308	103	103	TCA (S) => TTA (L)	0.86	rpl20
N. repanda	214	72	72	CCT (P) => TCT (S)	1	psbE
N. repanda	2	1	1	ACG (T) => ATG (M)	1	ndhD
N. repanda	383	128	128	TCA (S) => TTA (L)	1	ndhD
N. repanda	599	200	200	TCA (S) => TTA (L)	1	ndhD
N. repanda	674	225	225	TCG (S) => TTG (L)	1	ndhD
N. repanda	878	293	293	TCA (S) => TTA (L)	1	ndhD
N. repanda	1298	433	433	TCA (S) => TTA (L)	0.8	ndhD
N. repanda	1310	437	437	TCA (S) => TTA (L)	0.8	ndhD
N. repanda	791	264	264	CCC (P) => CTC (L)	1	atpA
N. repanda	92	31	31	CCA (P) => CTA (L)	0.86	atpF
N. repanda	830	277	279	TCA (S) => TTA (L)	1	rpoA
N. repanda	149	50	50	TCA (S) => TTA (L)	1	ndhB
N. repanda	467	156	156	CCA (P) => CTA (L)	1	ndhB
N. repanda	586	196	196	CAT (H) => TAT (Y)	1	ndhB
N. repanda	611	204	204	TCA (S) => TTA (L)	0.8	ndhB
N. repanda	737	246	246	CCA (P) => CTA (L)	1	ndhB
N. repanda	746	249	249	TCT (S) => TTT (F)	1	ndhB
N. repanda	830	277	277	TCA (S) => TTA (L)	1	ndhB
N. repanda	836	279	279	TCA (S) => TTA (L)	1	ndhB
N. repanda	1481	494	494	CCA (P) => CTA (L)	1	ndhB
N. repanda	611	204	204	CCA (P) => CTA (L)	1	petB
N. repanda	2	1	1	ACG (T) => ATG (M)	1	psbL
N. repanda	62	21	21	TCA (S) => TTA (L)	1	rpoC1
N. repanda	80	27	27	TCA (S) => TTA (L)	1	rps14
N. repanda	149	50	53	CCA (P) => CTA (L)	1	rps14
N. repanda	248	83	83	TCA (S) => TTA (L)	1	rps2
N. benthamiana	2	1	1	ACG (T) => ATG (M)	1	psbL
N. benthamiana	149	50	50	TCA (S) => TTA (L)	1	ndhB
N. benthamiana	467	156	156	CCA (P) => CTA (L)	1	ndhB
N. benthamiana	586	196	196	CAT (H) => TAT (Y)	1	ndhB
N. benthamiana	611	204	204	TCA (S) => TTA (L)	0.8	ndhB
N. benthamiana	737	246	246	CCA (P) => CTA (L)	1	ndhB
N. benthamiana	746	249	249	TCT (S) => TTT (F)	1	ndhB
N. benthamiana	830	277	277	TCA (S) => TTA (L)	1	ndhB
N. benthamiana	836	279	279	TCA (S) => TTA (L)	1	ndhB
N. benthamiana	1481	494	494	CCA (P) => CTA (L)	1	ndhB
N. benthamiana	611	204	204	CCA (P) => CTA (L)	1	petB
N. benthamiana	830	277	279	TCA (S) => TTA (L)	1	rpoA
N. benthamiana	92	31	31	CCA (P) => CTA (L)	0.86	atpF
N. benthamiana	214	72	72	CCT (P) => TCT (S)	1	psbE
N. benthamiana	80	27	27	TCA (S) => TTA (L)	1	rps14
N. benthamiana	149	50	53	CCA (P) => CTA (L)	1	rps14
N. benthamiana	791	264	264	CCC (P) => CTC (L)	1	atpA
N. benthamiana	2	1	1	ACG (T) => ATG (M)	1	ndhD
N. benthamiana	383	128	128	TCA (S) => TTA (L)	1	ndhD
N. benthamiana	599	200	200	TCA (S) => TTA (L)	1	ndhD
N. benthamiana	674	225	225	TCG (S) => TTG (L)	1	ndhD
N. benthamiana	878	293	293	TCA (S) => TTA (L)	1	ndhD
N. benthamiana	1298	433	433	TCA (S) => TTA (L)	0.8	ndhD
N. benthamiana	1310	437	437	TCA (S) => TTA (L)	0.8	ndhD
N. benthamiana	290	97	97	TCA (S) => TTA (L)	1	ndhF
N. benthamiana	341	114	114	TCA (S) => TTA (L)	1	ndhA
N. benthamiana	1073	358	358	TCC (S) => TTC (F)	1	ndhA
N. benthamiana	338	113	113	TCT (S) => TTT (F)	1	rpoB
N. benthamiana	473	158	159	TCA (S) => TTA (L)	0.86	rpoB
N. benthamiana	551	184	185	TCA (S) => TTA (L)	1	rpoB
N. benthamiana	2000	667	684	TCT (S) => TTT (F)	1	rpoB
N. benthamiana	248	83	83	TCA (S) => TTA (L)	1	rps2
N. benthamiana	62	21	21	TCA (S) => TTA (L)	1	rpoC1
N. benthamiana	2287	763	948	CGG (R) => TGG (W)	1	rpoC2
N. benthamiana	3731	1244	1450	TCA (S) => TTA (L)	0.86	rpoC2
N. benthamiana	308	103	103	TCA (S) => TTA (L)	0.86	rpl20
N. knightiana	248	83	83	TCA (S) => TTA (L)	1	rps2
N. knightiana	80	27	27	TCA (S) => TTA (L)	1	rps14
N. knightiana	149	50	53	CCA (P) => CTA (L)	1	rps14
N. knightiana	290	97	97	TCA (S) => TTA (L)	1	ndhF
N. knightiana	341	114	114	TCA (S) => TTA (L)	1	ndhA
N. knightiana	1073	358	358	TCC (S) => TTC (F)	1	ndhA
N. knightiana	338	113	113	TCT (S) => TTT (F)	1	rpoB
N. knightiana	473	158	159	TCA (S) => TTA (L)	0.86	rpoB
N. knightiana	551	184	185	TCA (S) => TTA (L)	1	rpoB
N. knightiana	2000	667	684	TCT (S) => TTT (F)	1	rpoB
N. knightiana	308	103	103	TCA (S) => TTA (L)	0.86	rpl20
N. knightiana	2287	763	948	CGG (R) => TGG (W)	1	rpoC2
N. knightiana	3731	1244	1450	TCA (S) => TTA (L)	0.86	rpoC2
N. knightiana	2	1	1	ACG (T) => ATG (M)	1	psbL
N. knightiana	611	204	204	CCA (P) => CTA (L)	1	petB
N. knightiana	149	50	50	TCA (S) => TTA (L)	1	ndhB
N. knightiana	467	156	156	CCA (P) => CTA (L)	1	ndhB
N. knightiana	586	196	196	CAT (H) => TAT (Y)	1	ndhB
N. knightiana	611	204	204	TCA (S) => TTA (L)	0.8	ndhB
N. knightiana	737	246	246	CCA (P) => CTA (L)	1	ndhB
N. knightiana	746	249	249	TCT (S) => TTT (F)	1	ndhB
N. knightiana	830	277	277	TCA (S) => TTA (L)	1	ndhB
N. knightiana	836	279	279	TCA (S) => TTA (L)	1	ndhB
N. knightiana	1481	494	494	CCA (P) => CTA (L)	1	ndhB
N. knightiana	830	277	279	TCA (S) => TTA (L)	1	rpoA
N. knightiana	92	31	31	CCA (P) => CTA (L)	0.86	atpF
N. knightiana	2	1	1	ACG (T) => ATG (M)	1	ndhD
N. knightiana	383	128	128	TCA (S) => TTA (L)	1	ndhD
N. knightiana	599	200	200	TCA (S) => TTA (L)	1	ndhD
N. knightiana	674	225	225	TCG (S) => TTG (L)	1	ndhD
N. knightiana	878	293	293	TCA (S) => TTA (L)	1	ndhD
N. knightiana	1298	433	433	TCA (S) => TTA (L)	0.8	ndhD
N. knightiana	1310	437	437	TCA (S) => TTA (L)	0.8	ndhD
N. knightiana	791	264	264	CCC (P) => CTC (L)	1	atpA
N. knightiana	62	21	21	TCA (S) => TTA (L)	1	rpoC1
N. knightiana	214	72	72	CCT (P) => TCT (S)	1	psbE
N. stocktonii	338	113	113	TCT (S) => TTT (F)	1	rpoB
N. stocktonii	473	158	159	TCA (S) => TTA (L)	0.86	rpoB
N. stocktonii	551	184	185	TCA (S) => TTA (L)	1	rpoB
N. stocktonii	2000	667	684	TCT (S) => TTT (F)	1	rpoB
N. stocktonii	290	97	97	TCA (S) => TTA (L)	1	ndhF
N. stocktonii	341	114	114	TCA (S) => TTA (L)	1	ndhA
N. stocktonii	1073	358	358	TCC (S) => TTC (F)	1	ndhA
N. stocktonii	830	277	279	TCA (S) => TTA (L)	1	rpoA
N. stocktonii	92	31	31	CCA (P) => CTA (L)	0.86	atpF
N. stocktonii	2	1	1	ACG (T) => ATG (M)	1	ndhD
N. stocktonii	383	128	128	TCA (S) => TTA (L)	1	ndhD
N. stocktonii	599	200	200	TCA (S) => TTA (L)	1	ndhD
N. stocktonii	674	225	225	TCG (S) => TTG (L)	1	ndhD
N. stocktonii	878	293	293	TCA (S) => TTA (L)	1	ndhD
N. stocktonii	1298	433	433	TCA (S) => TTA (L)	0.8	ndhD
N. stocktonii	1310	437	437	TCA (S) => TTA (L)	0.8	ndhD
N. stocktonii	791	264	264	CCC (P) => CTC (L)	1	atpA
N. stocktonii	214	72	72	CCT (P) => TCT (S)	1	psbE
N. stocktonii	2	1	1	ACG (T) => ATG (M)	1	psbL
N. stocktonii	80	27	27	TCA (S) => TTA (L)	1	rps14
N. stocktonii	149	50	53	CCA (P) => CTA (L)	1	rps14
N. stocktonii	611	204	204	CCA (P) => CTA (L)	1	petB
N. stocktonii	149	50	50	TCA (S) => TTA (L)	1	ndhB
N. stocktonii	467	156	156	CCA (P) => CTA (L)	1	ndhB
N. stocktonii	586	196	196	CAT (H) => TAT (Y)	1	ndhB
N. stocktonii	611	204	204	TCA (S) => TTA (L)	0.8	ndhB
N. stocktonii	737	246	246	CCA (P) => CTA (L)	1	ndhB
N. stocktonii	746	249	249	TCT (S) => TTT (F)	1	ndhB
N. stocktonii	830	277	277	TCA (S) => TTA (L)	1	ndhB
N. stocktonii	836	279	279	TCA (S) => TTA (L)	1	ndhB
N. stocktonii	1481	494	494	CCA (P) => CTA (L)	1	ndhB
N. stocktonii	308	103	103	TCA (S) => TTA (L)	0.86	rpl20
N. stocktonii	2287	763	948	CGG (R) => TGG (W)	1	rpoC2
N. stocktonii	3731	1244	1450	TCA (S) => TTA (L)	0.86	rpoC2
N. stocktonii	62	21	21	TCA (S) => TTA (L)	1	rpoC1
N. stocktonii	248	83	83	TCA (S) => TTA (L)	1	rps2
N. sylvestris	62	21	21	TCA (S) => TTA (L)	1	rpoC1
N. sylvestris	2287	763	948	CGG (R) => TGG (W)	1	rpoC2
N. sylvestris	3731	1244	1450	TCA (S) => TTA (L)	0.86	rpoC2
N. sylvestris	308	103	103	TCA (S) => TTA (L)	0.86	rpl20
N. sylvestris	248	83	83	TCA (S) => TTA (L)	1	rps2
N. sylvestris	338	113	113	TCT (S) => TTT (F)	1	rpoB
N. sylvestris	473	158	159	TCA (S) => TTA (L)	0.86	rpoB
N. sylvestris	551	184	185	TCA (S) => TTA (L)	1	rpoB
N. sylvestris	2000	667	684	TCT (S) => TTT (F)	1	rpoB
N. sylvestris	290	97	97	TCA (S) => TTA (L)	1	ndhF
N. sylvestris	80	27	27	TCA (S) => TTA (L)	1	rps14
N. sylvestris	149	50	53	CCA (P) => CTA (L)	1	rps14
N. sylvestris	341	114	114	TCA (S) => TTA (L)	1	ndhA
N. sylvestris	1073	358	358	TCC (S) => TTC (F)	1	ndhA
N. sylvestris	92	31	31	CCA (P) => CTA (L)	0.86	atpF
N. sylvestris	830	277	279	TCA (S) => TTA (L)	1	rpoA
N. sylvestris	214	72	72	CCT (P) => TCT (S)	1	psbE
N. sylvestris	791	264	264	CCC (P) => CTC (L)	1	atpA
N. sylvestris	2	1	1	ACG (T) => ATG (M)	1	ndhD
N. sylvestris	383	128	128	TCA (S) => TTA (L)	1	ndhD
N. sylvestris	599	200	200	TCA (S) => TTA (L)	1	ndhD
N. sylvestris	674	225	225	TCG (S) => TTG (L)	1	ndhD
N. sylvestris	1298	433	433	TCA (S) => TTA (L)	0.8	ndhD
N. sylvestris	1310	437	437	TCA (S) => TTA (L)	0.8	ndhD
N. sylvestris	2	1	1	ACG (T) => ATG (M)	1	psbL
N. sylvestris	149	50	50	TCA (S) => TTA (L)	1	ndhB
N. sylvestris	467	156	156	CCA (P) => CTA (L)	1	ndhB
N. sylvestris	586	196	196	CAT (H) => TAT (Y)	1	ndhB
N. sylvestris	611	204	204	TCA (S) => TTA (L)	0.8	ndhB
N. sylvestris	737	246	246	CCA (P) => CTA (L)	1	ndhB
N. sylvestris	746	249	249	TCT (S) => TTT (F)	1	ndhB
N. sylvestris	830	277	277	TCA (S) => TTA (L)	1	ndhB
N. sylvestris	836	279	279	TCA (S) => TTA (L)	1	ndhB
N. sylvestris	1481	494	494	CCA (P) => CTA (L)	1	ndhB
N. sylvestris	611	204	204	CCA (P) => CTA (L)	1	petB
N. heterantha	338	113	113	TCT (S) => TTT (F)	1	rpoB
N. heterantha	473	158	159	TCA (S) => TTA (L)	0.86	rpoB
N. heterantha	551	184	185	TCA (S) => TTA (L)	1	rpoB
N. heterantha	2000	667	684	TCT (S) => TTT (F)	1	rpoB
N. heterantha	341	114	114	TCA (S) => TTA (L)	1	ndhA
N. heterantha	1073	358	358	TCC (S) => TTC (F)	1	ndhA
N. heterantha	80	27	27	TCA (S) => TTA (L)	1	rps14
N. heterantha	149	50	53	CCA (P) => CTA (L)	1	rps14
N. heterantha	290	97	97	TCA (S) => TTA (L)	1	ndhF
N. heterantha	214	72	72	CCT (P) => TCT (S)	1	psbE
N. heterantha	2	1	1	ACG (T) => ATG (M)	1	ndhD
N. heterantha	383	128	128	TCA (S) => TTA (L)	1	ndhD
N. heterantha	599	200	200	TCA (S) => TTA (L)	1	ndhD
N. heterantha	674	225	225	TCG (S) => TTG (L)	1	ndhD
N. heterantha	878	293	293	TCA (S) => TTA (L)	1	ndhD
N. heterantha	1298	433	433	TCA (S) => TTA (L)	0.8	ndhD
N. heterantha	1310	437	437	TCA (S) => TTA (L)	0.8	ndhD
N. heterantha	791	264	264	CCC (P) => CTC (L)	1	atpA
N. heterantha	830	277	279	TCA (S) => TTA (L)	1	rpoA
N. heterantha	92	31	31	CCA (P) => CTA (L)	0.86	atpF
N. heterantha	149	50	50	TCA (S) => TTA (L)	1	ndhB
N. heterantha	467	156	156	CCA (P) => CTA (L)	1	ndhB
N. heterantha	586	196	196	CAT (H) => TAT (Y)	1	ndhB
N. heterantha	611	204	204	TCA (S) => TTA (L)	0.8	ndhB
N. heterantha	737	246	246	CCA (P) => CTA (L)	1	ndhB
N. heterantha	746	249	249	TCT (S) => TTT (F)	1	ndhB
N. heterantha	830	277	277	TCA (S) => TTA (L)	1	ndhB
N. heterantha	836	279	279	TCA (S) => TTA (L)	1	ndhB
N. heterantha	1481	494	494	CCA (P) => CTA (L)	1	ndhB
N. heterantha	611	204	204	CCA (P) => CTA (L)	1	petB
N. heterantha	2	1	1	ACG (T) => ATG (M)	1	psbL
N. heterantha	62	21	21	TCA (S) => TTA (L)	1	rpoC1
N. heterantha	308	103	103	TCA (S) => TTA (L)	0.86	rpl20
N. heterantha	2287	763	948	CGG (R) => TGG (W)	1	rpoC2
N. heterantha	3731	1244	1450	TCA (S) => TTA (L)	0.86	rpoC2
N. heterantha	248	83	83	TCA (S) => TTA (L)	1	rps2
N. glauca	308	103	103	TCA (S) => TTA (L)	0.86	rpl20
N. glauca	2287	763	948	CGG (R) => TGG (W)	1	rpoC2
N. glauca	3731	1244	1450	TCA (S) => TTA (L)	0.86	rpoC2
N. glauca	248	83	83	TCA (S) => TTA (L)	1	rps2
N. glauca	62	21	21	TCA (S) => TTA (L)	1	rpoC1
N. glauca	290	97	97	TCA (S) => TTA (L)	1	ndhF
N. glauca	341	114	114	TCA (S) => TTA (L)	1	ndhA
N. glauca	1073	358	358	TCC (S) => TTC (F)	1	ndhA
N. glauca	338	113	113	TCT (S) => TTT (F)	1	rpoB
N. glauca	473	158	159	TCA (S) => TTA (L)	0.86	rpoB
N. glauca	551	184	185	TCA (S) => TTA (L)	1	rpoB
N. glauca	2000	667	684	TCT (S) => TTT (F)	1	rpoB
N. glauca	2	1	1	ACG (T) => ATG (M)	1	psbL
N. glauca	80	27	27	TCA (S) => TTA (L)	1	rps14
N. glauca	149	50	53	CCA (P) => CTA (L)	1	rps14
N. glauca	149	50	50	TCA (S) => TTA (L)	1	ndhB
N. glauca	467	156	156	CCA (P) => CTA (L)	1	ndhB
N. glauca	586	196	196	CAT (H) => TAT (Y)	1	ndhB
N. glauca	611	204	204	TCA (S) => TTA (L)	0.8	ndhB
N. glauca	737	246	246	CCA (P) => CTA (L)	1	ndhB
N. glauca	746	249	249	TCT (S) => TTT (F)	1	ndhB
N. glauca	830	277	277	TCA (S) => TTA (L)	1	ndhB
N. glauca	836	279	279	TCA (S) => TTA (L)	1	ndhB
N. glauca	1481	494	494	CCA (P) => CTA (L)	1	ndhB
N. glauca	611	204	204	CCA (P) => CTA (L)	1	petB
N. glauca	92	31	31	CCA (P) => CTA (L)	0.86	atpF
N. glauca	830	277	279	TCA (S) => TTA (L)	1	rpoA
N. glauca	214	72	72	CCT (P) => TCT (S)	1	psbE
N. glauca	791	264	264	CCC (P) => CTC (L)	1	atpA
N. glauca	2	1	1	ACG (T) => ATG (M)	1	ndhD
N. glauca	383	128	128	TCA (S) => TTA (L)	1	ndhD
N. glauca	599	200	200	TCA (S) => TTA (L)	1	ndhD
N. glauca	674	225	225	TCG (S) => TTG (L)	1	ndhD
N. glauca	826	276	276	CTT (L) => TTT (F)	1	ndhD
N. glauca	878	293	293	TCA (S) => TTA (L)	1	ndhD
N. glauca	1298	433	433	TCA (S) => TTA (L)	0.8	ndhD
N. glauca	1310	437	437	TCA (S) => TTA (L)	0.8	ndhD
N. tabacum cv. TN90	338	113	113	TCT (S) => TTT (F)	1	rpoB
N. tabacum cv. TN90	473	158	159	TCA (S) => TTA (L)	0.86	rpoB
N. tabacum cv. TN90	551	184	185	TCA (S) => TTA (L)	1	rpoB
N. tabacum cv. TN90	2000	667	684	TCT (S) => TTT (F)	1	rpoB
N. tabacum cv. TN90	341	114	114	TCA (S) => TTA (L)	1	ndhA
N. tabacum cv. TN90	1073	358	358	TCC (S) => TTC (F)	1	ndhA
N. tabacum cv. TN90	290	97	97	TCA (S) => TTA (L)	1	ndhF
N. tabacum cv. TN90	214	72	72	CCT (P) => TCT (S)	1	psbE
N. tabacum cv. TN90	2	1	1	ACG (T) => ATG (M)	1	ndhD
N. tabacum cv. TN90	383	128	128	TCA (S) => TTA (L)	1	ndhD
N. tabacum cv. TN90	599	200	200	TCA (S) => TTA (L)	1	ndhD
N. tabacum cv. TN90	674	225	225	TCG (S) => TTG (L)	1	ndhD
N. tabacum cv. TN90	1298	433	433	TCA (S) => TTA (L)	0.8	ndhD
N. tabacum cv. TN90	1310	437	437	TCA (S) => TTA (L)	0.8	ndhD
N. tabacum cv. TN90	80	27	27	TCA (S) => TTA (L)	1	rps14
N. tabacum cv. TN90	149	50	53	CCA (P) => CTA (L)	1	rps14
N. tabacum cv. TN90	791	264	264	CCC (P) => CTC (L)	1	atpA
N. tabacum cv. TN90	92	31	31	CCA (P) => CTA (L)	0.86	atpF
N. tabacum cv. TN90	830	277	279	TCA (S) => TTA (L)	1	rpoA
N. tabacum cv. TN90	149	50	50	TCA (S) => TTA (L)	1	ndhB
N. tabacum cv. TN90	467	156	156	CCA (P) => CTA (L)	1	ndhB
N. tabacum cv. TN90	586	196	196	CAT (H) => TAT (Y)	1	ndhB
N. tabacum cv. TN90	611	204	204	TCA (S) => TTA (L)	0.8	ndhB
N. tabacum cv. TN90	737	246	246	CCA (P) => CTA (L)	1	ndhB
N. tabacum cv. TN90	746	249	249	TCT (S) => TTT (F)	1	ndhB
N. tabacum cv. TN90	830	277	277	TCA (S) => TTA (L)	1	ndhB
N. tabacum cv. TN90	836	279	279	TCA (S) => TTA (L)	1	ndhB
N. tabacum cv. TN90	1481	494	494	CCA (P) => CTA (L)	1	ndhB
N. tabacum cv. TN90	611	204	204	CCA (P) => CTA (L)	1	petB
N. tabacum cv. TN90	2	1	1	ACG (T) => ATG (M)	1	psbL
N. tabacum cv. TN90	2287	763	948	CGG (R) => TGG (W)	1	rpoC2
N. tabacum cv. TN90	3731	1244	1450	TCA (S) => TTA (L)	0.86	rpoC2
N. tabacum cv. TN90	308	103	103	TCA (S) => TTA (L)	0.86	rpl20
N. tabacum cv. TN90	62	21	21	TCA (S) => TTA (L)	1	rpoC1
N. tabacum cv. TN90	248	83	83	TCA (S) => TTA (L)	1	rps2
N. occidentalis subsp. obliqua	830	277	279	TCA (S) => TTA (L)	1	rpoA
N. occidentalis subsp. obliqua	62	21	21	TCA (S) => TTA (L)	1	rpoC1
N. occidentalis subsp. obliqua	92	31	31	CCA (P) => CTA (L)	0.86	atpF
N. occidentalis subsp. obliqua	214	72	72	CCT (P) => TCT (S)	1	psbE
N. occidentalis subsp. obliqua	791	264	264	CCC (P) => CTC (L)	1	atpA
N. occidentalis subsp. obliqua	2	1	1	ACG (T) => ATG (M)	1	ndhD
N. occidentalis subsp. obliqua	383	128	128	TCA (S) => TTA (L)	1	ndhD
N. occidentalis subsp. obliqua	599	200	200	TCA (S) => TTA (L)	1	ndhD
N. occidentalis subsp. obliqua	674	225	225	TCG (S) => TTG (L)	1	ndhD
N. occidentalis subsp. obliqua	878	293	293	TCA (S) => TTA (L)	1	ndhD
N. occidentalis subsp. obliqua	1298	433	433	TCA (S) => TTA (L)	0.8	ndhD
N. occidentalis subsp. obliqua	1310	437	437	TCA (S) => TTA (L)	0.8	ndhD
N. occidentalis subsp. obliqua	2	1	1	ACG (T) => ATG (M)	1	psbL
N. occidentalis subsp. obliqua	149	50	50	TCA (S) => TTA (L)	1	ndhB
N. occidentalis subsp. obliqua	467	156	156	CCA (P) => CTA (L)	1	ndhB
N. occidentalis subsp. obliqua	586	196	196	CAT (H) => TAT (Y)	1	ndhB
N. occidentalis subsp. obliqua	611	204	204	TCA (S) => TTA (L)	0.8	ndhB
N. occidentalis subsp. obliqua	737	246	246	CCA (P) => CTA (L)	1	ndhB
N. occidentalis subsp. obliqua	746	249	249	TCT (S) => TTT (F)	1	ndhB
N. occidentalis subsp. obliqua	830	277	277	TCA (S) => TTA (L)	1	ndhB
N. occidentalis subsp. obliqua	836	279	279	TCA (S) => TTA (L)	1	ndhB
N. occidentalis subsp. obliqua	1481	494	494	CCA (P) => CTA (L)	1	ndhB
N. occidentalis subsp. obliqua	611	204	204	CCA (P) => CTA (L)	1	petB
N. occidentalis subsp. obliqua	338	113	113	TCT (S) => TTT (F)	1	rpoB
N. occidentalis subsp. obliqua	473	158	159	TCA (S) => TTA (L)	0.86	rpoB
N. occidentalis subsp. obliqua	551	184	185	TCA (S) => TTA (L)	1	rpoB
N. occidentalis subsp. obliqua	2000	667	684	TCT (S) => TTT (F)	1	rpoB
N. occidentalis subsp. obliqua	2287	763	948	CGG (R) => TGG (W)	1	rpoC2
N. occidentalis subsp. obliqua	3731	1244	1450	TCA (S) => TTA (L)	0.86	rpoC2
N. occidentalis subsp. obliqua	308	103	103	TCA (S) => TTA (L)	0.86	rpl20
N. occidentalis subsp. obliqua	290	97	97	TCA (S) => TTA (L)	1	ndhF
N. occidentalis subsp. obliqua	341	114	114	TCA (S) => TTA (L)	1	ndhA
N. occidentalis subsp. obliqua	1073	358	358	TCC (S) => TTC (F)	1	ndhA
N. occidentalis subsp. obliqua	248	83	83	TCA (S) => TTA (L)	1	rps2
N. occidentalis subsp. obliqua	80	27	27	TCA (S) => TTA (L)	1	rps14
N. occidentalis subsp. obliqua	149	50	53	CCA (P) => CTA (L)	1	rps14
N. undulata	169	57	57	CAT (H) => TAT (Y)	0.86	rps8
N. undulata	80	27	27	TCA (S) => TTA (L)	1	rps14
N. undulata	149	50	53	CCA (P) => CTA (L)	1	rps14
N. undulata	248	83	83	TCA (S) => TTA (L)	1	rps2
N. undulata	341	114	114	TCA (S) => TTA (L)	1	ndhA
N. undulata	290	97	97	TCA (S) => TTA (L)	1	ndhF
N. undulata	62	21	21	TCA (S) => TTA (L)	1	rpoC1
N. undulata	338	113	113	TCT (S) => TTT (F)	1	rpoB
N. undulata	473	158	159	TCA (S) => TTA (L)	0.86	rpoB
N. undulata	551	184	185	TCA (S) => TTA (L)	1	rpoB
N. undulata	2000	667	684	TCT (S) => TTT (F)	1	rpoB
N. undulata	611	204	204	CCA (P) => CTA (L)	1	petB
N. undulata	149	50	50	TCA (S) => TTA (L)	1	ndhB
N. undulata	467	156	156	CCA (P) => CTA (L)	1	ndhB
N. undulata	586	196	196	CAT (H) => TAT (Y)	1	ndhB
N. undulata	611	204	204	TCA (S) => TTA (L)	0.8	ndhB
N. undulata	737	246	246	CCA (P) => CTA (L)	1	ndhB
N. undulata	746	249	249	TCT (S) => TTT (F)	1	ndhB
N. undulata	830	277	277	TCA (S) => TTA (L)	1	ndhB
N. undulata	836	279	279	TCA (S) => TTA (L)	1	ndhB
N. undulata	1481	494	494	CCA (P) => CTA (L)	1	ndhB
N. undulata	2287	763	948	CGG (R) => TGG (W)	1	rpoC2
N. undulata	3731	1244	1450	TCA (S) => TTA (L)	0.86	rpoC2
N. undulata	2	1	1	ACG (T) => ATG (M)	1	psbL
N. undulata	308	103	103	TCA (S) => TTA (L)	0.86	rpl20
N. undulata	2	1	1	ACG (T) => ATG (M)	1	ndhD
N. undulata	383	128	128	TCA (S) => TTA (L)	1	ndhD
N. undulata	599	200	200	TCA (S) => TTA (L)	1	ndhD
N. undulata	674	225	225	TCG (S) => TTG (L)	1	ndhD
N. undulata	878	293	293	TCA (S) => TTA (L)	1	ndhD
N. undulata	1298	433	433	TCA (S) => TTA (L)	0.8	ndhD
N. undulata	1310	437	437	TCA (S) => TTA (L)	0.8	ndhD
N. undulata	791	264	264	CCC (P) => CTC (L)	1	atpA
N. undulata	214	72	72	CCT (P) => TCT (S)	1	psbE
N. undulata	92	31	31	CCA (P) => CTA (L)	0.86	atpF
N. undulata	830	277	279	TCA (S) => TTA (L)	1	rpoA
