# Supplementary material for: Comparative Chloroplast Genomes of Nicotiana Species (Solanaceae): Insights Into the Genetic Variation, Phylogenetic Relationship, and Polyploid Speciation
Source: Front Plant Sci. 2022 Jul 4;13:899252. doi: 10.3389/fpls.2022.899252 (PMC9295722; doi:10.3389/fpls.2022.899252)
Supplement: Supplementary file 3 [file Table_3.XLSX]

## Sheet: Table S3
Table S3 A summary of the SNPs and indels identified among the 24 chloroplast genomes of Nicitiana species
Region	Length	SNPs		indels		Total
		Number	Proportion (%)	Number	Proportion (%)	Number	proportion (%)
LSC	86685	2781	0.0320817	395	0.00455673	3176	0.0366384
SSC	18572	851	0.0458217	53	0.00285376	904	0.0486754
IR	25342	125	0.00493252	26	0.00102596	151	0.00595849
whole plastome	155941	3882	0.024894	500	0.00320634	4382	0.0281004
N. sylvestris was used as reference for SNPs detection in Nicotiana spacies.
