# Supplementary material for: Comparative Chloroplast Genomes of Nicotiana Species (Solanaceae): Insights Into the Genetic Variation, Phylogenetic Relationship, and Polyploid Speciation
Source: Front Plant Sci. 2022 Jul 4;13:899252. doi: 10.3389/fpls.2022.899252 (PMC9295722; doi:10.3389/fpls.2022.899252)
Supplement: Supplementary file 4 [file Table_4.XLSX]

## Sheet: Table S4
Table S4 Analyses of variable sites in chloroplast genomes of Nicotinan species.
Types	Number of sites	Number of variable sites	Number of informative sites	Nucleotide diversity
LSC region	86396	2863	2791	0.00587
SSC region	18513	802	770	0.00765
IR region	25420	211	205	0.00149
Exon region	79805	1801	1759	0.00381
Intron region	20105	625	609	0.00535
Intergenic region	48735	1884	1818	0.00747
Complete plastid genome	158508	4217	4096	0.0047
