# Supplementary material for: Comparative Chloroplast Genomes of Nicotiana Species (Solanaceae): Insights Into the Genetic Variation, Phylogenetic Relationship, and Polyploid Speciation
Source: Front Plant Sci. 2022 Jul 4;13:899252. doi: 10.3389/fpls.2022.899252 (PMC9295722; doi:10.3389/fpls.2022.899252)
Supplement: Supplementary file 5 [file Table_5.XLSX]

## Sheet: Table S5
Table S5 The number, type and distribution of SSRs of 24 chloroplast genomes of Nicotiana species.
Spacies	A/T	C/G	AC/GT	AG/CT	AT/TA	AAC/GTT	AAG/CTT	AAT/ATT	ACC/GGT	ACG/CGT	ACT/AGT	AGC/CTG	AGG/CCT	ATC/ATG	AAAC/GTTT	AAAT/ATTT	AGAT/ATCT	AAAG/CTTT	AAATT/AATTT	AAAAC/GTTTT	AAAAAT/ATTTTT	AAAAG/CTTTT	AATT/AATT	Total
N. tabacum cv. Basma Xanthi	240	16	1	15	25	7	25	20	2	1	2	6	4	6	3	4	1	1	1	0	0	0	0	380
N. tabacum cv. K326	241	16	1	15	25	7	25	20	2	1	2	6	4	6	3	4	1	1	1	0	0	0	0	381
N. tabacum cv. TN90	240	16	1	15	25	7	25	20	2	1	2	6	4	6	3	4	1	1	1	0	0	0	0	380
N. sylvestris	240	16	1	15	25	7	25	20	2	1	2	6	4	6	3	4	1	1	1	0	0	0	0	380
N. glauca	238	16	1	15	28	7	24	19	2	1	2	6	4	6	3	3	1	0	0	0	0	0	0	376
N. benthamiana	237	16	0	15	25	7	23	17	2	1	2	7	4	6	3	5	1	0	0	0	0	0	0	371
N. heterantha	245	16	0	14	26	7	24	17	2	1	2	7	4	6	3	5	1	0	0	0	0	0	0	380
N. cavicola	236	16	0	15	25	7	23	16	2	1	2	7	4	6	3	5	1	0	0	0	0	0	0	369
N. simulans	235	17	0	15	26	7	23	17	2	1	2	7	4	6	3	4	1	0	0	0	0	0	0	370
N. rosulata subsp. rosulata	249	16	0	15	28	7	23	17	2	1	2	7	4	6	3	6	1	0	0	0	0	1	0	388
N. occidentalis subsp. obliqua	238	16	0	15	26	7	23	17	2	1	2	7	4	6	3	5	1	0	0	0	0	0	0	373
N. occidentalis subsp. occidentalis	239	16	0	15	26	7	23	17	2	1	2	7	4	6	3	5	1	0	0	0	0	0	0	374
N. nesophila	241	16	0	15	24	6	24	20	2	1	2	6	4	6	3	5	1	0	0	0	0	0	0	376
N. stocktonii	238	16	0	15	24	6	24	20	2	1	2	6	4	6	3	5	1	0	0	0	1	0	0	374
N. repanda	242	16	0	15	25	6	24	19	2	1	2	6	4	6	3	5	1	0	0	0	0	0	0	377
N. nudicaulis	239	16	0	15	25	6	22	19	2	1	2	6	4	6	3	5	1	0	0	0	0	0	0	372
N. rustica	232	16	1	15	25	7	23	18	2	1	2	6	4	6	3	5	1	0	0	0	0	0	0	367
N. knightiana	229	16	1	15	25	7	23	18	2	1	2	6	4	6	3	5	1	0	0	0	0	0	0	364
N. paniculata	230	16	1	16	25	7	23	18	2	1	3	6	4	6	3	5	1	0	0	0	0	0	0	367
N. undulata	243	20	1	15	25	7	23	18	2	1	2	6	4	7	3	6	0	0	1	0	0	0	1	385
N. attenuata	243	19	1	16	24	7	24	16	3	1	2	6	4	6	3	4	1	0	0	0	0	0	0	380
N. obtusifolia	245	19	1	16	26	7	23	18	2	1	2	6	4	6	3	5	1	0	1	0	0	0	0	386
N. otophora	243	16	1	16	26	7	24	17	2	1	1	6	4	4	3	4	0	0	0	1	0	0	0	376
N. tomentosiformis	247	21	1	17	25	7	22	18	2	1	2	5	5	6	2	5	1	0	1	0	0	0	0	388
Total	5750	400	13	365	609	164	565	436	49	24	48	150	97	143	71	113	22	4	7	1	1	1	1	9034
	0.636484	0.0442772		0.0404029	0.067412	0.0181536	0.0625415	0.0482621				0.0166039				0.0125083
