# Supplementary material for: Comparative Chloroplast Genomes of Nicotiana Species (Solanaceae): Insights Into the Genetic Variation, Phylogenetic Relationship, and Polyploid Speciation
Source: Front Plant Sci. 2022 Jul 4;13:899252. doi: 10.3389/fpls.2022.899252 (PMC9295722; doi:10.3389/fpls.2022.899252)
Supplement: Supplementary file 6 [file Table_6.XLSX]

## Sheet: Table S6
Table S6 Numbers of various types of microsatellites present in the 24 chloroplast genomes of Nicotiana species.
Spacies	Mononucleotide		Dinucleotide		Trinucleotide		Tetranucleotide		Pentanucleotide		Total
	Number	Rate	Number	Rate	Number	Rate	Number	Rate	Number	Rate
N. tabacum cv. Basma Xanthi	256	0.673684	41	0.107895	73	0.192105	9	0.0236842	1	0.00263158	380
N. tabacum cv. K326	257	0.674541	41	0.107612	73	0.191601	9	0.023622	1	0.00262467	381
N. tabacum cv. TN90	256	0.673684	41	0.107895	73	0.192105	9	0.0236842	1	0.00263158	380
N. sylvestris	256	0.673684	41	0.107895	73	0.192105	9	0.0236842	1	0.00263158	380
N. glauca	254	0.675532	44	0.117021	71	0.18883	7	0.018617	0	0	376
N. benthamiana	253	0.681941	40	0.107817	69	0.185984	9	0.0242588	0	0	371
N. heterantha	261	0.686842	40	0.105263	70	0.184211	9	0.0236842	0	0	380
N. cavicola	252	0.682927	40	0.108401	68	0.184282	9	0.0243902	0	0	369
N. simulans	252	0.681081	41	0.110811	69	0.186486	8	0.0216216	0	0	370
N. rosulata subsp. rosulata	265	0.68299	43	0.110825	69	0.177835	10	0.0257732	1	0.00257732	388
N. occidentalis subsp. obliqua	254	0.680965	41	0.10992	69	0.184987	9	0.0241287	0	0	373
N. occidentalis subsp. occidentalis	255	0.681818	41	0.109626	69	0.184492	9	0.0240642	0	0	374
N. nesophila	257	0.683511	39	0.103723	71	0.18883	9	0.0239362	0	0	376
N. stocktonii	254	0.679144	39	0.104278	71	0.18984	9	0.0240642	1	0.0026738	374
N. repanda	258	0.68435	40	0.106101	70	0.185676	9	0.0238727	0	0	377
N. nudicaulis	255	0.685484	40	0.107527	68	0.182796	9	0.0241935	0	0	372
N. rustica	248	0.675749	41	0.111717	69	0.188011	9	0.0245232	0	0	367
N. knightiana	245	0.673077	41	0.112637	69	0.18956	9	0.0247253	0	0	364
N. paniculata	246	0.6703	42	0.114441	70	0.190736	9	0.0245232	0	0	367
N. undulata	263	0.683117	41	0.106494	70	0.181818	10	0.025974	1	0.0025974	385
N. attenuata	262	0.689474	41	0.107895	69	0.181579	8	0.0210526	0	0	380
N. obtusifolia	264	0.683938	43	0.111399	69	0.178756	9	0.0233161	1	0.00259067	386
N. otophora	259	0.68883	43	0.114362	66	0.175532	7	0.018617	1	0.00265957	376
N. tomentosiformis	268	0.690722	43	0.110825	68	0.175258	8	0.0206186	1	0.00257732	388
