# Supplementary material for: Comparative Chloroplast Genomes of Nicotiana Species (Solanaceae): Insights Into the Genetic Variation, Phylogenetic Relationship, and Polyploid Speciation
Source: Front Plant Sci. 2022 Jul 4;13:899252. doi: 10.3389/fpls.2022.899252 (PMC9295722; doi:10.3389/fpls.2022.899252)
Supplement: Supplementary file 7 [file Table_7.XLSX]

## Sheet: Table S7
Table S7 The percentage of SSRs in different regions of Nicotiana chloroplast genomes.
Spacies	Rate in LSC Region	Rate in SSC Region	Rate in IR Region	Rate in CDS Region	Rate in Intergenic Region
N. tabacum cv. Basma Xanthi	0.614776	0.153034	0.23219	0.387863	0.612137
N. tabacum cv. K326	0.615789	0.152632	0.231579	0.386842	0.613158
N. tabacum cv. TN90	0.620053	0.153034	0.226913	0.387863	0.612137
N. sylvestris	0.614776	0.153034	0.23219	0.387863	0.612137
N. glauca	0.605333	0.149333	0.245333	0.381333	0.618667
N. benthamiana	0.601078	0.150943	0.247978	0.38814	0.61186
N. heterantha	0.594737	0.147368	0.257895	0.381579	0.618421
N. cavicola	0.598916	0.140921	0.260163	0.398374	0.601626
N. simulans	0.6	0.151351	0.248649	0.391892	0.608108
N. rosulata subsp. rosulata	0.587629	0.14433	0.268041	0.371134	0.628866
N. occidentalis subsp. obliqua	0.603217	0.150134	0.246649	0.386059	0.613941
N. occidentalis subsp. occidentalis	0.609626	0.149733	0.240642	0.387701	0.612299
N. nesophila	0.616	0.149333	0.234667	0.381333	0.618667
N. stocktonii	0.612903	0.150538	0.236559	0.384409	0.615591
N. repanda	0.606383	0.148936	0.244681	0.380319	0.619681
N. nudicaulis	0.61186	0.150943	0.237197	0.382749	0.617251
N. rustica	0.612022	0.147541	0.240437	0.385246	0.614754
N. knightiana	0.61708	0.146006	0.236915	0.385675	0.614325
N. paniculata	0.617486	0.147541	0.234973	0.385246	0.614754
N. undulata	0.620779	0.155844	0.223377	0.381818	0.618182
N. attenuata	0.605263	0.160526	0.234211	0.394737	0.605263
N. obtusifolia	0.624352	0.15285	0.222798	0.370466	0.629534
N. otophora	0.614362	0.156915	0.228723	0.382979	0.617021
N. tomentosiformis	0.613402	0.154639	0.231959	0.386598	0.613402
Average	0.609909	0.150728	0.239363	0.384926	0.615074
