# Supplementary material for: Comparative Chloroplast Genomes of Nicotiana Species (Solanaceae): Insights Into the Genetic Variation, Phylogenetic Relationship, and Polyploid Speciation
Source: Front Plant Sci. 2022 Jul 4;13:899252. doi: 10.3389/fpls.2022.899252 (PMC9295722; doi:10.3389/fpls.2022.899252)
Supplement: Supplementary file 8 [file Table_8.XLSX]

## Sheet: Table S8
Table S8 the number and rate of Tandem, Palindromic and Forward repeats among 24 chloroplast genomes of Nicotiana species
Name	Tandem repeats						Palindromic repeats						Forward repeats
	Total number	Rate in LSC region	Rate in SSC region	Rate in IR regions	Rate in CDS region	Rate in intergenic region	Total number	Rate in LSC region	Rate in SSC region	Rate in IR regions	Rate in CDS region	Rate in intergenic region	Total number	Rate in LSC region	Rate in SSC region	Rate in IR regions	Rate in CDS region	Rate in intergenic region
N. tabacum cv. K326	29	0.482759	0.0689655	0.448276	0.241379	0.758621	16	0.375	0.03125	0.59375	0.3125	0.6875	21	0.428571	0.119048	0.452381	0.309524	0.642857
N. tabacum cv. Basma Xanthi	28	0.464286	0.0714286	0.464286	0.25	0.75	16	0.375	0.03125	0.59375	0.3125	0.6875	18	0.333333	0.138889	0.527778	0.305556	0.638889
N. tabacum cv. TN90	28	0.464286	0.0714286	0.464286	0.25	0.75	17	0.382353	0.0294118	0.558824	0.294118	0.705882	19	0.368421	0.131579	0.5	0.342105	0.605263
N. rosulata subsp. rosulata	23	0.391304	0.130435	0.478261	0.304348	0.695652	24	0.229167	0.0208333	0.75	0.104167	0.895833	25	0.32	0.08	0.6	0.14	0.82
N. paniculata	23	0.521739	0.0869565	0.391304	0.347826	0.652174	16	0.3125	0.0625	0.625	0.3125	0.6875	16	0.21875	0.15625	0.625	0.34375	0.59375
N. cavicola	22	0.454545	0.136364	0.409091	0.318182	0.681818	17	0.352941	0.0588235	0.588235	0.294118	0.705882	18	0.305556	0.138889	0.555556	0.305556	0.638889
N. nesophila	21	0.571429	0.0952381	0.333333	0.333333	0.666667	15	0.4	0.0666667	0.533333	0.3	0.7	16	0.34375	0.15625	0.5	0.40625	0.53125
N. occidentalis subsp. obliqua	26	0.538462	0.115385	0.346154	0.269231	0.730769	25	0.14	0.02	0.84	0.02	0.98	24	0.0416667	0.0833333	0.875	0	0.958333
N. occidentalis subsp. occidentalis	26	0.538462	0.115385	0.346154	0.269231	0.730769	19	0.342105	0.0526316	0.605263	0.263158	0.736842	29	0.517241	0.0862069	0.396552	0.189655	0.775862
N. rustica	22	0.5	0.0909091	0.409091	0.363636	0.636364	16	0.3125	0.0625	0.625	0.3125	0.6875	17	0.264706	0.147059	0.588235	0.323529	0.617647
N. nudicaulis	16	0.5625	0.0625	0.375	0.4375	0.5625	15	0.4	0.0666667	0.533333	0.3	0.7	14	0.25	0.178571	0.571429	0.392857	0.535714
N. tomentosiformis	27	0.481481	0.111111	0.407407	0.296296	0.703704	17	0.352941	0.0588235	0.588235	0.176471	0.823529	15	0.233333	0.166667	0.6	0.166667	0.766667
N. obtusifolia	21	0.619048	0.142857	0.238095	0.285714	0.714286	13	0.461538	0.0769231	0.461538	0.230769	0.769231	14	0.464286	0.178571	0.357143	0.178571	0.75
N. attenuata	23	0.391304	0.130435	0.478261	0.391304	0.608696	17	0.352941	0.0882353	0.558824	0.294118	0.705882	22	0.363636	0.204545	0.431818	0.431818	0.522727
N. otophora	22	0.5	0.0909091	0.409091	0.318182	0.681818	17	0.352941	0.0588235	0.588235	0.294118	0.705882	17	0.264706	0.147059	0.588235	0.323529	0.617647
N. simulans	21	0.428571	0.142857	0.428571	0.333333	0.666667	16	0.3125	0.0625	0.625	0.3125	0.6875	17	0.264706	0.147059	0.588235	0.323529	0.617647
N. repanda	19	0.526316	0.105263	0.368421	0.368421	0.631579	15	0.4	0.0666667	0.533333	0.3	0.7	13	0.192308	0.192308	0.615385	0.423077	0.5
N. benthamiana	19	0.368421	0.157895	0.473684	0.368421	0.631579	16	0.3125	0.0625	0.625	0.3125	0.6875	17	0.264706	0.147059	0.588235	0.323529	0.617647
N. knightiana	22	0.5	0.0909091	0.409091	0.363636	0.636364	16	0.3125	0.0625	0.625	0.3125	0.6875	17	0.264706	0.147059	0.588235	0.323529	0.617647
N. stocktonii	20	0.55	0.1	0.35	0.35	0.65	14	0.357143	0.0714286	0.571429	0.321429	0.678571	16	0.34375	0.15625	0.5	0.40625	0.53125
N. sylvestris	28	0.464286	0.0714286	0.464286	0.25	0.75	16	0.375	0.03125	0.59375	0.3125	0.6875	18	0.333333	0.138889	0.527778	0.305556	0.638889
N. heterantha	30	0.6	0.0333333	0.366667	0.233333	0.766667	24	0.0833333	0	0.916667	0	1	25	0.08	0.04	0.88	0.04	0.92
N. glauca	22	0.454545	0.0909091	0.454545	0.318182	0.681818	19	0.421053	0.0526316	0.526316	0.263158	0.736842	17	0.264706	0.147059	0.588235	0.323529	0.617647
N. undulata	21	0.47619	0.0952381	0.428571	0.333333	0.666667	16	0.3125	0.0625	0.625	0.3125	0.6875	17	0.264706	0.147059	0.588235	0.323529	0.617647
Average	23.2917	0.493747	0.100339	0.405914	0.316451	0.683549	17.1667	0.334519	0.0523882	0.611867	0.261172	0.738828	18.4167	0.291287	0.140652	0.568061	0.289662	0.653911
